# Supplementary material for: WITHDRAWN: Association Between Mediterranean Diet Adherence and Dyspeptic Symptoms in Older Adults: A Cross-sectional Study in a Geriatric Outpatient Population
Source: Research Square preprint supplement (doi:10.21203/rs.3.rs-8497003/v1), 2026-01-16
Supplement: Supplementary file 2 [file b3dbb1ca3e3fddb7361e9dd0.docx]

**Supplementary File 2. Data Collection Form**

Questionnaire No: ……….
**1. Date of birth: ............................................................**
**2. Sex**
 1. Male 2. Female

**3. Marital status**
 1. Married 2. Single 3. Widowed 4. Divorced

**4. Educational status (please mark according to the highest level completed)**
 1. Illiterate-Literate
 2. Primary school
 3. Middle school- High school
 4. University or higher

**5. How would you describe your income–expense status?**
 1. Income is higher than expenses
 2. Income is lower than expenses
 3. Income is equal to expenses

**6. With whom do you live?**
 1. Alone
 2. With family
 3. With friends
 4. Other: ................................

**7. Height: .......... cm Weight: .......... kg**

**8. Do you have any physician-diagnosed disease that requires regular follow-up or ongoing treatment?**
 0. None
 1.Yes: .....................................................................................................

1. **9. Do you regularly use any medications?**
2. 1.No
3. 2.Yes → Please specify:…………………………………………………………….

   **10. How many meals do you eat per day?**
    **(.................. Main meals ...................... Snacks)**

   **11. Meal skipping status:**
   **Breakfast:** 1.Always / 2.Sometimes / 3.Never
   **Lunch:** 1.Always / 2.Sometimes / 3.Never
   **Dinner:** 1.Always / 2.Sometimes / 3.Never
   **Snacks:** 1.Always / 2.Sometimes / 3.Never
